# Supplementary material for: Impact of Unexpected In-House Major COVID-19 Outbreaks on Depressive Symptoms among Healthcare Workers: A Retrospective Multi-Institutional Study
Source: MDPI journal article supplement (doi:10.3390/ijerph20064718), 2023-03-07
Supplement: s1 [file s1]

**Table S1.** Multiple logistic regression analysis for the PHQ-9 total scores  $\geq 10$  compared with  $< 10$ ) by the period of in-house COVID-19 outbreak occurrence

|                                                                               | December 2020 to May 2021 ( $n = 243$ ) |             |             |              |  | August 2021 to April 2022 ( $n = 283$ ) |             |             |              |  |
|-------------------------------------------------------------------------------|-----------------------------------------|-------------|-------------|--------------|--|-----------------------------------------|-------------|-------------|--------------|--|
|                                                                               | <i>OR</i>                               | 95% CI      |             | <i>p</i>     |  | <i>OR</i>                               | 95% CI      |             | <i>p</i>     |  |
|                                                                               |                                         | <i>LL</i>   | <i>UL</i>   |              |  |                                         | <i>LL</i>   | <i>UL</i>   |              |  |
| Facility type                                                                 |                                         |             |             |              |  |                                         |             |             |              |  |
| Hospital                                                                      | Ref                                     |             |             |              |  | Ref                                     |             |             |              |  |
| Nursing home                                                                  | 0.99                                    | 0.20        | 4.81        | 0.989        |  | 1.04                                    | 0.53        | 2.05        | 0.906        |  |
| Number of days between outbreak occurrence and response to the screening test | 0.99                                    | 0.98        | 1.01        | 0.497        |  | 0.98                                    | 0.90        | 1.07        | 0.688        |  |
| Sex                                                                           |                                         |             |             |              |  |                                         |             |             |              |  |
| Woman                                                                         | Ref                                     |             |             |              |  | Ref                                     |             |             |              |  |
| Man                                                                           | 1.08                                    | 0.51        | 2.32        | 0.835        |  | 1.10                                    | 0.55        | 2.20        | 0.781        |  |
| Age (years)                                                                   |                                         |             |             |              |  |                                         |             |             |              |  |
| 20–29                                                                         | Ref                                     |             |             |              |  | Ref                                     |             |             |              |  |
| 30–39                                                                         | 0.79                                    | 0.33        | 1.88        | 0.595        |  | 0.56                                    | 0.26        | 1.20        | 0.137        |  |
| 40–49                                                                         | 1.38                                    | 0.58        | 3.28        | 0.467        |  | 1.44                                    | 0.67        | 3.12        | 0.352        |  |
| 50–59                                                                         | 0.78                                    | 0.29        | 2.12        | 0.625        |  | 1.26                                    | 0.57        | 2.78        | 0.562        |  |
| $\geq 60$                                                                     | 1.09                                    | 0.33        | 3.67        | 0.886        |  | 0.99                                    | 0.29        | 3.36        | 0.985        |  |
| Job type                                                                      |                                         |             |             |              |  |                                         |             |             |              |  |
| Other HCW                                                                     | Ref                                     |             |             |              |  | Ref                                     |             |             |              |  |
| Nurse                                                                         | <b>2.40</b>                             | <b>1.24</b> | <b>4.66</b> | <b>0.010</b> |  | <b>2.45</b>                             | <b>1.29</b> | <b>4.66</b> | <b>0.006</b> |  |
| Nursing home staff                                                            | 2.01                                    | 0.41        | 9.81        | 0.388        |  | 1.51                                    | 0.66        | 3.46        | 0.332        |  |
| COVID-19 infection status                                                     |                                         |             |             |              |  |                                         |             |             |              |  |
| PCR-negative                                                                  | Ref                                     |             |             |              |  | Ref                                     |             |             |              |  |
| PCR-positive                                                                  | 1.81                                    | 0.82        | 4.03        | 0.145        |  | 1.43                                    | 0.73        | 2.80        | 0.295        |  |
| Unknown PCR status                                                            | 1.47                                    | 0.35        | 6.12        | 0.599        |  | 1.54                                    | 0.60        | 3.99        | 0.370        |  |
| $R^2$                                                                         | 0.08                                    |             |             |              |  | 0.11                                    | *           |             |              |  |

*Note.* HCW, healthcare worker; PCR, Polymerase Chain Reaction; PHQ-9, Patient Health Questionnaire-9.

\*  $p < .05$

**Table S2.** Multiple logistic regression analysis for the PHQ-9 total scores ( $\geq 10$  compared with  $< 10$ ) by facility type

|                                                                               | Hospital ( $n = 405$ ) |             |             |              | Nursing home ( $n = 121$ ) |        |      |       |
|-------------------------------------------------------------------------------|------------------------|-------------|-------------|--------------|----------------------------|--------|------|-------|
|                                                                               | OR                     | 95% CI      |             | $p$          | OR                         | 95% CI |      | $p$   |
|                                                                               |                        | LL          | UL          |              |                            | LL     | UL   |       |
| Number of days between outbreak occurrence and response to the screening test | 0.99                   | 0.98        | 1.00        | 0.104        | 1.02                       | 0.96   | 1.07 | 0.594 |
| Sex                                                                           |                        |             |             |              |                            |        |      |       |
| Woman                                                                         | Ref                    |             |             |              | Ref                        |        |      |       |
| Man                                                                           | 0.89                   | 0.50        | 1.59        | 0.692        | 2.14                       | 0.79   | 5.85 | 0.136 |
| Age (years)                                                                   |                        |             |             |              |                            |        |      |       |
| 20–29                                                                         | Ref                    |             |             |              | Ref                        |        |      |       |
| 30–39                                                                         | 0.62                   | 0.33        | 1.18        | 0.144        | 0.63                       | 0.14   | 2.72 | 0.531 |
| 40–49                                                                         | 1.36                   | 0.74        | 2.50        | 0.329        | 1.21                       | 0.26   | 5.70 | 0.808 |
| 50–59                                                                         | 0.92                   | 0.46        | 1.84        | 0.820        | 1.16                       | 0.26   | 5.24 | 0.844 |
| $\geq 60$                                                                     | 1.13                   | 0.41        | 3.16        | 0.810        | 0.85                       | 0.14   | 5.27 | 0.865 |
| Job type                                                                      |                        |             |             |              |                            |        |      |       |
| Other HCW                                                                     | Ref                    |             |             |              | Ref                        |        |      |       |
| Nurse                                                                         | <b>2.36</b>            | <b>1.45</b> | <b>3.85</b> | <b>0.001</b> | 2.95                       | 0.91   | 9.58 | 0.073 |
| Nursing home staff                                                            | 1.53                   | 0.48        | 4.88        | 0.469        | 1.82                       | 0.71   | 4.64 | 0.211 |
| COVID-19 infection status                                                     |                        |             |             |              |                            |        |      |       |
| PCR-negative                                                                  | Ref                    |             |             |              | Ref                        |        |      |       |
| PCR-positive                                                                  | <b>1.85</b>            | <b>1.00</b> | <b>3.41</b> | <b>0.050</b> | 0.84                       | 0.30   | 2.33 | 0.741 |
| Unknown PCR status                                                            | 2.20                   | 0.75        | 6.49        | 0.153        | 0.67                       | 0.22   | 2.04 | 0.480 |
| $R^2$                                                                         | 0.12                   | **          |             |              | 0.09                       |        |      |       |

Note. HCW, healthcare worker; PCR, Polymerase Chain Reaction; PHQ-9, Patient Health Questionnaire-9.

\*\*  $p < .01$

**Table S3.** Multiple logistic regression analysis for the PHQ-9 total scores ( $\geq 10$  compared with  $< 10$ ) by sex

|                                                                               | Woman ( $n = 394$ ) |             |             |                  | Man ( $n = 132$ ) |        |       |       |
|-------------------------------------------------------------------------------|---------------------|-------------|-------------|------------------|-------------------|--------|-------|-------|
|                                                                               | OR                  | 95% CI      |             | $p$              | OR                | 95% CI |       | $p$   |
|                                                                               |                     | LL          | UL          |                  |                   | LL     | UL    |       |
| Facility type                                                                 |                     |             |             |                  |                   |        |       |       |
| Hospital                                                                      | Ref                 |             |             |                  | Ref               |        |       |       |
| Nursing home                                                                  | 0.85                | 0.44        | 1.62        | 0.615            | 2.53              | 0.60   | 10.68 | 0.208 |
| Number of days between outbreak occurrence and response to the screening test | <b>0.99</b>         | <b>0.97</b> | <b>1.00</b> | <b>0.043</b>     | 1.01              | 0.98   | 1.03  | 0.570 |
| Age (years)                                                                   |                     |             |             |                  |                   |        |       |       |
| 20–29                                                                         | Ref                 |             |             |                  | Ref               |        |       |       |
| 30–39                                                                         | 0.63                | 0.31        | 1.28        | 0.199            | 0.53              | 0.18   | 1.50  | 0.230 |
| 40–49                                                                         | 1.41                | 0.75        | 2.65        | 0.288            | 0.89              | 0.20   | 3.90  | 0.875 |
| 50–59                                                                         | 1.20                | 0.62        | 2.33        | 0.594            | 0.33              | 0.06   | 1.74  | 0.192 |
| $\geq 60$                                                                     | 0.99                | 0.40        | 2.45        | 0.984            | 0.87              | 0.08   | 9.52  | 0.912 |
| Job type                                                                      |                     |             |             |                  |                   |        |       |       |
| Other HCW                                                                     | Ref                 |             |             |                  | Ref               |        |       |       |
| Nurse                                                                         | <b>2.71</b>         | <b>1.62</b> | <b>4.52</b> | <b>&lt;0.001</b> | 2.67              | 0.91   | 7.89  | 0.075 |
| Nursing home staff                                                            | 1.78                | 0.81        | 3.91        | 0.149            | 1.22              | 0.28   | 5.33  | 0.787 |
| COVID-19 infection status                                                     |                     |             |             |                  |                   |        |       |       |
| PCR-negative                                                                  | Ref                 |             |             |                  | Ref               |        |       |       |
| PCR-positive                                                                  | 1.27                | 0.71        | 2.25        | 0.418            | 2.68              | 0.87   | 8.30  | 0.086 |
| Unknown PCR status                                                            | 1.50                | 0.64        | 3.49        | 0.346            | 1.35              | 0.33   | 5.56  | 0.679 |
| $R^2$                                                                         | 0.11                | **          |             |                  | 0.15              |        |       |       |

Note. HCW, healthcare worker; PCR, Polymerase Chain Reaction; PHQ-9, Patient Health Questionnaire-9.

\*\*  $p < .01$

**Table S4.** Multiple logistic regression analysis for the PHQ-9 total scores ( $\geq 10$  compared with  $< 10$ ) by age

|                                                                               | Aged 20–29 ( $n = 132$ ) |        |       |       | Aged 30–39 ( $n = 143$ ) |        |      |       | Aged 40–49 ( $n = 114$ ) |        |       |       | Aged 50–59 ( $n = 103$ ) |        |      |       | Aged $\geq 60$ ( $n = 34$ ) |              |                 |              |
|-------------------------------------------------------------------------------|--------------------------|--------|-------|-------|--------------------------|--------|------|-------|--------------------------|--------|-------|-------|--------------------------|--------|------|-------|-----------------------------|--------------|-----------------|--------------|
|                                                                               | OR                       | 95% CI |       | $p$   | OR                       | 95% CI |      | $p$   | OR                       | 95% CI |       | OR    | OR                       | 95% CI |      | $p$   | OR                          | 95% CI       |                 | $p$          |
|                                                                               |                          | LL     | UL    |       |                          | LL     | UL   |       |                          | LL     | UL    |       |                          | LL     | UL   |       |                             | LL           | UL              |              |
| Facility type                                                                 |                          |        |       |       |                          |        |      |       |                          |        |       |       |                          |        |      |       |                             |              |                 |              |
| Hospital                                                                      | Ref                      |        |       |       | Ref                      |        |      |       | Ref                      |        |       |       | Ref                      |        |      |       | Ref                         |              |                 |              |
| Nursing home                                                                  | 0.48                     | 0.03   | 6.85  | 0.587 | 1.07                     | 0.28   | 4.05 | 0.922 | 0.70                     | 0.22   | 2.19  | 0.538 | 1.27                     | 0.46   | 3.53 | 0.643 | 15.09                       | 0.25         | 894.35          | 0.193        |
| Number of days between outbreak occurrence and response to the screening test | 1.00                     | 0.97   | 1.02  | 0.667 | 1.00                     | 0.98   | 1.02 | 0.971 | 0.98                     | 0.96   | 1.01  | 0.126 | 0.98                     | 0.94   | 1.01 | 0.237 | 1.07                        | 0.97         | 1.18            | 0.155        |
| Sex                                                                           |                          |        |       |       |                          |        |      |       |                          |        |       |       |                          |        |      |       |                             |              |                 |              |
| Woman                                                                         | Ref                      |        |       |       | Ref                      |        |      |       | Ref                      |        |       |       | Ref                      |        |      |       | Ref                         |              |                 |              |
| Man                                                                           | 1.11                     | 0.47   | 2.61  | 0.818 | 1.18                     | 0.49   | 2.83 | 0.716 | 1.16                     | 0.33   | 4.14  | 0.819 | 0.47                     | 0.11   | 2.07 | 0.318 | 8.03                        | 0.83         | 77.60           | 0.072        |
| Job type                                                                      |                          |        |       |       |                          |        |      |       |                          |        |       |       |                          |        |      |       |                             |              |                 |              |
| Other HCW                                                                     | Ref                      |        |       |       | Ref                      |        |      |       | Ref                      |        |       |       | Ref                      |        |      |       | Ref                         |              |                 |              |
| Nurse                                                                         | 1.92                     | 0.80   | 4.63  | 0.145 | 2.05                     | 0.76   | 5.51 | 0.155 | 2.33                     | 0.88   | 6.15  | 0.088 | 1.84                     | 0.63   | 5.41 | 0.267 | <b>917.50</b>               | <b>14.67</b> | <b>57383.72</b> | <b>0.001</b> |
| Nursing home staff                                                            | 5.54                     | 0.34   | 89.75 | 0.228 | 1.87                     | 0.44   | 7.89 | 0.397 | 2.37                     | 0.54   | 10.35 | 0.253 | 0.78                     | 0.19   | 3.14 | 0.726 | 18.12                       | 1.17         | 279.89          | 0.038        |
| COVID-19 infection status                                                     |                          |        |       |       |                          |        |      |       |                          |        |       |       |                          |        |      |       |                             |              |                 |              |
| PCR-negative                                                                  | Ref                      |        |       |       | Ref                      |        |      |       | Ref                      |        |       |       | Ref                      |        |      |       | Ref                         |              |                 |              |
| PCR-positive                                                                  | 1.17                     | 0.33   | 4.17  | 0.809 | 1.91                     | 0.69   | 5.30 | 0.211 | 1.08                     | 0.37   | 3.13  | 0.886 | 3.03                     | 0.98   | 9.35 | 0.053 | 0.07                        | 0.00         | 6.22            | 0.245        |
| Unknown PCR status                                                            | 1.25                     | 0.16   | 9.58  | 0.831 | 1.36                     | 0.24   | 7.58 | 0.726 | 1.49                     | 0.44   | 5.01  | 0.518 | 2.06                     | 0.45   | 9.49 | 0.354 | 0.37                        | 0.00         | 27.59           | 0.651        |
| $R^2$                                                                         | 0.05                     |        |       |       | 0.06                     |        |      |       | 0.10                     |        |       |       | 0.17                     |        |      |       | 0.61                        | *            |                 |              |

Note. HCW, healthcare worker; PCR, Polymerase Chain Reaction; PHQ-9, Patient Health Questionnaire-9.

\*  $p < .05$

**Table S5.** Multiple logistic regression analysis for the PHQ-9 total scores ( $\geq 10$  compared with  $< 10$ ) by job type

|                                                                               | Nurse ( $n = 214$ ) |           |           |          | Nursing home staff ( $n = 71$ ) |           |           |          | Other HCW ( $n = 241$ ) |           |           |          |
|-------------------------------------------------------------------------------|---------------------|-----------|-----------|----------|---------------------------------|-----------|-----------|----------|-------------------------|-----------|-----------|----------|
|                                                                               | <i>OR</i>           | 95% CI    |           | <i>p</i> | <i>OR</i>                       | 95% CI    |           | <i>p</i> | <i>OR</i>               | 95% CI    |           | <i>p</i> |
|                                                                               |                     | <i>LL</i> | <i>UL</i> |          |                                 | <i>LL</i> | <i>UL</i> |          |                         | <i>LL</i> | <i>UL</i> |          |
| Facility type                                                                 |                     |           |           |          |                                 |           |           |          |                         |           |           |          |
| Hospital                                                                      | Ref                 |           |           |          | Ref                             |           |           |          | Ref                     |           |           |          |
| Nursing home                                                                  | 1.00                | 0.39      | 2.52      | 0.992    | 1.19                            | 0.32      | 4.38      | 0.794    | 1.35                    | 0.50      | 3.66      | 0.554    |
| Number of days between outbreak occurrence and response to the screening test | 0.99                | 0.97      | 1.01      | 0.226    | 1.01                            | 0.92      | 1.11      | 0.801    | 1.00                    | 0.98      | 1.01      | 0.807    |
| Sex                                                                           |                     |           |           |          |                                 |           |           |          |                         |           |           |          |
| Woman                                                                         | Ref                 |           |           |          | Ref                             |           |           |          | Ref                     |           |           |          |
| Man                                                                           | 0.95                | 0.36      | 2.53      | 0.919    | 1.25                            | 0.34      | 4.60      | 0.742    | 1.04                    | 0.54      | 2.00      | 0.906    |
| Age (years)                                                                   |                     |           |           |          |                                 |           |           |          |                         |           |           |          |
| 20–29                                                                         | Ref                 |           |           |          | Ref                             |           |           |          | Ref                     |           |           |          |
| 30–39                                                                         | 0.63                | 0.26      | 1.53      | 0.311    | 0.38                            | 0.07      | 2.17      | 0.278    | 0.64                    | 0.27      | 1.51      | 0.304    |
| 40–49                                                                         | 1.43                | 0.63      | 3.25      | 0.390    | 0.80                            | 0.12      | 5.48      | 0.824    | 1.21                    | 0.46      | 3.15      | 0.699    |
| 50–59                                                                         | 1.21                | 0.47      | 3.11      | 0.693    | 0.45                            | 0.08      | 2.69      | 0.383    | 0.95                    | 0.36      | 2.54      | 0.921    |
| $\geq 60$                                                                     | 2.37                | 0.64      | 8.71      | 0.194    | 0.30                            | 0.03      | 2.95      | 0.303    | 0.29                    | 0.03      | 2.90      | 0.294    |
| COVID-19 infection status                                                     |                     |           |           |          |                                 |           |           |          |                         |           |           |          |
| PCR-negative                                                                  | Ref                 |           |           |          | Ref                             |           |           |          | Ref                     |           |           |          |
| PCR-positive                                                                  | 1.84                | 0.89      | 3.78      | 0.098    | 0.76                            | 0.21      | 2.76      | 0.676    | 1.45                    | 0.55      | 3.79      | 0.453    |
| Unknown PCR status                                                            | 2.96                | 0.76      | 11.48     | 0.116    | 0.70                            | 0.18      | 2.71      | 0.600    | 1.00                    | 0.24      | 4.24      | 0.999    |
| $R^2$                                                                         | 0.08                |           |           |          | 0.05                            |           |           |          | 0.04                    |           |           |          |

*Note.* HCW, healthcare worker; PCR, Polymerase Chain Reaction; PHQ-9, Patient Health Questionnaire-9.

**Table S6.** Multiple logistic regression analysis for the PHQ-9 total scores ( $\geq 10$  compared with  $< 10$ ) by COVID-19 infection status

|                                                                               | PCR-negative ( $n = 377$ ) |             |             |              | PCR-positive ( $n = 102$ ) |             |              |              | Unknown ( $n = 47$ ) |        |       |       |
|-------------------------------------------------------------------------------|----------------------------|-------------|-------------|--------------|----------------------------|-------------|--------------|--------------|----------------------|--------|-------|-------|
|                                                                               | OR                         | 95% CI      |             | $p$          | OR                         | 95% CI      |              | $p$          | OR                   | 95% CI |       | $p$   |
|                                                                               |                            | LL          | UL          |              |                            | LL          | UL           |              |                      | LL     | UL    |       |
| Facility type                                                                 |                            |             |             |              |                            |             |              |              |                      |        |       |       |
| Hospital                                                                      | Ref                        |             |             |              | Ref                        |             |              |              | Ref                  |        |       |       |
| Nursing home                                                                  | 1.35                       | 0.62        | 2.92        | 0.452        | 1.17                       | 0.36        | 3.81         | 0.800        | 0.64                 | 0.08   | 5.51  | 0.688 |
| Number of days between outbreak occurrence and response to the screening test | 0.99                       | 0.97        | 1.00        | 0.076        | 1.00                       | 0.98        | 1.03         | 0.933        | 0.97                 | 0.91   | 1.03  | 0.285 |
| Sex                                                                           |                            |             |             |              |                            |             |              |              |                      |        |       |       |
| Woman                                                                         | Ref                        |             |             |              | Ref                        |             |              |              | Ref                  |        |       |       |
| Man                                                                           | 0.81                       | 0.43        | 1.51        | 0.507        | 3.17                       | 0.82        | 12.24        | 0.095        | 0.88                 | 0.19   | 4.03  | 0.865 |
| Age (years)                                                                   |                            |             |             |              |                            |             |              |              |                      |        |       |       |
| 20–29                                                                         | Ref                        |             |             |              | Ref                        |             |              |              | Ref                  |        |       |       |
| 30–39                                                                         | 0.53                       | 0.27        | 1.06        | 0.074        | 0.69                       | 0.18        | 2.68         | 0.589        | 1.13                 | 0.06   | 20.82 | 0.935 |
| 40–49                                                                         | 1.29                       | 0.68        | 2.47        | 0.436        | 1.13                       | 0.29        | 4.42         | 0.858        | 2.90                 | 0.13   | 65.11 | 0.502 |
| 50–59                                                                         | 0.72                       | 0.34        | 1.51        | 0.384        | 1.78                       | 0.49        | 6.43         | 0.378        | 2.44                 | 0.09   | 67.38 | 0.599 |
| $\geq 60$                                                                     | 1.09                       | 0.39        | 3.06        | 0.864        | 0.72                       | 0.10        | 5.29         | 0.749        | 1.75                 | 0.05   | 60.18 | 0.758 |
| Job type                                                                      |                            |             |             |              |                            |             |              |              |                      |        |       |       |
| Other HCW                                                                     | Ref                        |             |             |              | Ref                        |             |              |              | Ref                  |        |       |       |
| Nurse                                                                         | <b>2.16</b>                | <b>1.29</b> | <b>3.60</b> | <b>0.003</b> | <b>4.80</b>                | <b>1.18</b> | <b>19.58</b> | <b>0.029</b> | 5.90                 | 0.56   | 62.41 | 0.140 |
| Nursing home staff                                                            | 1.92                       | 0.73        | 5.02        | 0.184        | 1.84                       | 0.42        | 8.11         | 0.422        | 1.74                 | 0.25   | 12.06 | 0.574 |
| $R^2$                                                                         | 0.11                       | **          |             |              | 0.13                       |             |              |              | 0.21                 |        |       |       |

Note. HCW, healthcare worker; PCR, Polymerase Chain Reaction; PHQ-9, Patient Health Questionnaire-9.

\*\*  $p < .01$

**Table S7.** Multiple logistic regression analysis for the item nine scores of PHQ-9 ( $\geq 1$  compared with  $< 1$ ) by the period of in-house COVID-19 outbreak occurrence

|                                                                               | December 2020 to May 2021 ( $n = 243$ ) |             |             |             |              | August 2021 to April 2022 ( $n = 283$ ) |             |             |              |              |
|-------------------------------------------------------------------------------|-----------------------------------------|-------------|-------------|-------------|--------------|-----------------------------------------|-------------|-------------|--------------|--------------|
|                                                                               | OR                                      | 95% CI      |             | $p$         |              | OR                                      | 95% CI      |             | $p$          |              |
|                                                                               |                                         | LL          | UL          |             |              |                                         | LL          | UL          |              |              |
| Facility type                                                                 |                                         |             |             |             |              |                                         |             |             |              |              |
| Hospital                                                                      | Ref                                     |             |             |             |              | Ref                                     |             |             |              |              |
| Nursing home                                                                  |                                         | 4.36        | 0.50        | 38.25       | 0.183        |                                         | 1.30        | 0.50        | 3.39         | 0.591        |
| Number of days between outbreak occurrence and response to the screening test |                                         | 1.01        | 0.97        | 1.04        | 0.767        |                                         | 1.00        | 0.88        | 1.15         | 0.982        |
| Sex                                                                           |                                         |             |             |             |              |                                         |             |             |              |              |
| Woman                                                                         | Ref                                     |             |             |             |              | Ref                                     |             |             |              |              |
| Man                                                                           |                                         | 1.44        | 0.53        | 3.92        | 0.478        |                                         | 1.06        | 0.41        | 2.76         | 0.907        |
| Age (years)                                                                   |                                         |             |             |             |              |                                         |             |             |              |              |
| 20–29                                                                         | Ref                                     |             |             |             |              | Ref                                     |             |             |              |              |
| 30–39                                                                         |                                         | 0.82        | 0.21        | 3.20        | 0.777        |                                         | <b>0.32</b> | <b>0.12</b> | <b>0.89</b>  | <b>0.029</b> |
| 40–49                                                                         |                                         | 0.76        | 0.16        | 3.63        | 0.726        |                                         | 0.66        | 0.25        | 1.71         | 0.392        |
| 50–59                                                                         | N/A                                     |             |             |             |              |                                         | <b>0.28</b> | <b>0.09</b> | <b>0.89</b>  | <b>0.031</b> |
| $\geq 60$                                                                     |                                         | 1.46        | 0.19        | 11.19       | 0.715        |                                         | 0.21        | 0.02        | 2.07         | 0.183        |
| Job type                                                                      |                                         |             |             |             |              |                                         |             |             |              |              |
| Other HCW                                                                     | Ref                                     |             |             |             |              | Ref                                     |             |             |              |              |
| Nurse                                                                         |                                         | <b>1.75</b> | <b>0.63</b> | <b>4.87</b> | <b>0.280</b> |                                         | <b>3.08</b> | <b>1.18</b> | <b>8.05</b>  | <b>0.021</b> |
| Nursing home staff                                                            | N/A                                     |             |             |             |              |                                         | <b>3.95</b> | <b>1.18</b> | <b>13.26</b> | <b>0.026</b> |
| COVID-19 infection status                                                     |                                         |             |             |             |              |                                         |             |             |              |              |
| PCR-negative                                                                  | Ref                                     |             |             |             |              | Ref                                     |             |             |              |              |
| PCR-positive                                                                  |                                         | 1.63        | 0.40        | 6.68        | 0.497        |                                         | 1.43        | 0.65        | 3.17         | 0.372        |
| Unknown PCR status                                                            |                                         | 0.50        | 0.03        | 7.73        | 0.620        |                                         | 0.18        | 0.02        | 1.63         | 0.127        |
| $R^2$                                                                         |                                         | 0.96        |             |             |              |                                         | 0.19        | *           |              |              |

Note. HCW, healthcare worker; PCR, Polymerase Chain Reaction; PHQ-9, Patient Health Questionnaire-9.

\*  $p < .05$

**Table S8.** Multiple logistic regression analysis for the item nine scores of PHQ-9 ( $\geq 1$  compared with  $< 1$ ) by facility type

|                                                                               | Hospital ( $n = 405$ ) |             |              |              | Nursing home ( $n = 121$ ) |        |       |       |
|-------------------------------------------------------------------------------|------------------------|-------------|--------------|--------------|----------------------------|--------|-------|-------|
|                                                                               | OR                     | 95% CI      |              | $p$          | OR                         | 95% CI |       | $p$   |
|                                                                               |                        | LL          | UL           |              |                            | LL     | UL    |       |
| Number of days between outbreak occurrence and response to the screening test | 0.98                   | 0.96        | 1.00         | 0.111        | 0.98                       | 0.86   | 1.11  | 0.729 |
| Sex                                                                           |                        |             |              |              |                            |        |       |       |
| Woman                                                                         | Ref                    |             |              |              | Ref                        |        |       |       |
| Man                                                                           | 1.02                   | 0.44        | 2.38         | 0.963        | 3.22                       | 0.68   | 15.21 | 0.140 |
| Age (years)                                                                   |                        |             |              |              |                            |        |       |       |
| 20–29                                                                         | Ref                    |             |              |              | Ref                        |        |       |       |
| 30–39                                                                         | 0.39                   | 0.15        | 1.02         | 0.054        | 0.38                       | 0.06   | 2.51  | 0.316 |
| 40–49                                                                         | 0.66                   | 0.28        | 1.56         | 0.342        | 0.91                       | 0.12   | 6.90  | 0.927 |
| 50–59                                                                         | <b>0.14</b>            | <b>0.03</b> | <b>0.58</b>  | <b>0.007</b> | 0.36                       | 0.04   | 3.00  | 0.346 |
| $\geq 60$                                                                     | 0.36                   | 0.05        | 2.70         | 0.324        | 0.49                       | 0.04   | 5.56  | 0.565 |
| Job type                                                                      |                        |             |              |              |                            |        |       |       |
| Other HCW                                                                     | Ref                    |             |              |              | Ref                        |        |       |       |
| Nurse                                                                         | <b>2.50</b>            | <b>1.14</b> | <b>5.48</b>  | <b>0.022</b> | 4.00                       | 0.78   | 20.59 | 0.097 |
| Nursing home staff                                                            | <b>11.10</b>           | <b>2.54</b> | <b>48.51</b> | <b>0.001</b> | 1.61                       | 0.41   | 6.42  | 0.497 |
| COVID-19 infection status                                                     |                        |             |              |              |                            |        |       |       |
| PCR-negative                                                                  | Ref                    |             |              |              | Ref                        |        |       |       |
| PCR-positive                                                                  | 1.71                   | 0.72        | 4.02         | 0.223        | 1.34                       | 0.37   | 4.89  | 0.659 |
| Unknown PCR status                                                            | 0.31                   | 0.03        | 3.73         | 0.354        | 0.21                       | 0.02   | 2.42  | 0.208 |
| $R^2$                                                                         | 0.20                   | **          |              |              | 0.29                       |        |       |       |

Note. HCW, healthcare worker; PCR, Polymerase Chain Reaction; PHQ-9, Patient Health Questionnaire-9.

\*\*  $p < .01$

**Table S9.** Multiple logistic regression analysis for the item nine scores of PHQ-9 ( $\geq 1$  compared with  $< 1$ ) by sex

|                                                                               | Woman ( <i>n</i> = 394) |             |             |              | Man ( <i>n</i> = 132) |           |           |          |
|-------------------------------------------------------------------------------|-------------------------|-------------|-------------|--------------|-----------------------|-----------|-----------|----------|
|                                                                               | <i>OR</i>               | 95% CI      |             | <i>p</i>     | <i>OR</i>             | 95% CI    |           | <i>p</i> |
|                                                                               |                         | <i>LL</i>   | <i>UL</i>   |              |                       | <i>LL</i> | <i>UL</i> |          |
| Facility type                                                                 |                         |             |             |              |                       |           |           |          |
| Hospital                                                                      | Ref                     |             |             |              | Ref                   |           |           |          |
| Nursing home                                                                  | 1.46                    | 0.44        | 4.85        | 0.539        | 1.62                  | 0.22      | 11.69     | 0.634    |
| Number of days between outbreak occurrence and response to the screening test | <b>0.97</b>             | <b>0.95</b> | <b>0.99</b> | <b>0.017</b> | 1.00                  | 0.97      | 1.04      | 0.861    |
| Age (years)                                                                   |                         |             |             |              |                       |           |           |          |
| 20–29                                                                         | Ref                     |             |             |              | Ref                   |           |           |          |
| 30–39                                                                         | <b>0.25</b>             | <b>0.09</b> | <b>0.70</b> | <b>0.009</b> | 0.91                  | 0.23      | 3.68      | 0.900    |
| 40–49                                                                         | 0.57                    | 0.25        | 1.33        | 0.194        | 1.52                  | 0.29      | 7.98      | 0.620    |
| 50–59                                                                         | <b>0.19</b>             | <b>0.07</b> | <b>0.56</b> | <b>0.002</b> | 0.92                  | 0.10      | 8.59      | 0.940    |
| $\geq 60$                                                                     | 0.27                    | 0.05        | 1.37        | 0.114        | 1.40                  | 0.03      | 69.22     | 0.867    |
| Job type                                                                      |                         |             |             |              |                       |           |           |          |
| Other HCW                                                                     | Ref                     |             |             |              | Ref                   |           |           |          |
| Nurse                                                                         | <b>2.73</b>             | <b>1.21</b> | <b>6.17</b> | <b>0.016</b> | 2.78                  | 0.73      | 10.59     | 0.135    |
| Nursing home staff                                                            | 2.32                    | 0.52        | 10.42       | 0.272        | 5.45                  | 0.66      | 44.70     | 0.114    |
| COVID-19 infection status                                                     |                         |             |             |              |                       |           |           |          |
| PCR-negative                                                                  | Ref                     |             |             |              | Ref                   |           |           |          |
| PCR-positive                                                                  | 1.19                    | 0.52        | 2.74        | 0.676        | 2.31                  | 0.56      | 9.51      | 0.247    |
| Unknown PCR status                                                            | 0.23                    | 0.03        | 1.96        | 0.177        | 0.34                  | 0.02      | 6.88      | 0.484    |
| <i>R</i> <sup>2</sup>                                                         | 0.23                    | **          |             |              | 0.17                  |           |           |          |

*Note.* HCW, healthcare worker; PCR, Polymerase Chain Reaction; PHQ-9, Patient Health Questionnaire-9.

\*\* *p* < .01

**Table S10.** Multiple logistic regression analysis for the item nine scores of PHQ-9 ( $\geq 1$  compared with  $< 1$ ) by age

|                                                                               | Aged 20–29 ( <i>n</i> = 132) |             |              |              | Aged 30–39 ( <i>n</i> = 143) |             |              |              | Aged 40–49 ( <i>n</i> = 114) |             |              |              | Aged 50–59 ( <i>n</i> = 103) |        |       |          |
|-------------------------------------------------------------------------------|------------------------------|-------------|--------------|--------------|------------------------------|-------------|--------------|--------------|------------------------------|-------------|--------------|--------------|------------------------------|--------|-------|----------|
|                                                                               | OR                           | 95% CI      |              | <i>p</i>     | OR                           | 95% CI      |              | <i>p</i>     | OR                           | 95% CI      |              | OR           | OR                           | 95% CI |       | <i>p</i> |
|                                                                               |                              | LL          | UL           |              |                              | LL          | UL           |              |                              | LL          | UL           |              |                              | LL     | UL    |          |
| Facility type                                                                 |                              |             |              |              |                              |             |              |              |                              |             |              |              |                              |        |       |          |
| Hospital                                                                      | Ref                          |             |              |              | Ref                          |             |              |              | Ref                          |             |              |              | Ref                          |        |       |          |
| Nursing home                                                                  | 2.53                         | 0.20        | 32.06        | 0.473        | 0.80                         | 0.20        | 3.18         | 0.756        | 0.83                         | 0.11        | 6.04         | 0.856        | 1.70                         | 0.23   | 12.61 | 0.601    |
| Number of days between outbreak occurrence and response to the screening test | <b>0.96</b>                  | <b>0.93</b> | <b>0.99</b>  | <b>0.022</b> | 1.01                         | 0.97        | 1.06         | 0.501        | 0.97                         | 0.93        | 1.01         | 0.127        | 0.85                         | 0.72   | 1.01  | 0.068    |
| Sex                                                                           |                              |             |              |              |                              |             |              |              |                              |             |              |              |                              |        |       |          |
| Woman                                                                         | Ref                          |             |              |              | Ref                          |             |              |              | Ref                          |             |              |              | Ref                          |        |       |          |
| Man                                                                           | 0.57                         | 0.18        | 1.83         | 0.348        | 2.03                         | 0.59        | 7.03         | 0.265        | 1.90                         | 0.29        | 12.55        | 0.506        | 2.99                         | 0.41   | 21.89 | 0.280    |
| Job type                                                                      |                              |             |              |              |                              |             |              |              |                              |             |              |              |                              |        |       |          |
| Other HCW                                                                     | Ref                          |             |              |              | Ref                          |             |              |              | Ref                          |             |              |              | Ref                          |        |       |          |
| Nurse                                                                         | <b>4.67</b>                  | <b>1.31</b> | <b>16.61</b> | <b>0.017</b> | 1.61                         | 0.29        | 9.10         | 0.587        | 2.53                         | 0.37        | 17.40        | 0.344        | 1.29                         | 0.21   | 7.99  | 0.785    |
| Nursing home staff                                                            | 1.26                         | 0.08        | 20.27        | 0.870        | <b>10.50</b>                 | <b>2.42</b> | <b>45.69</b> | <b>0.002</b> | 5.07                         | 0.47        | 54.47        | 0.180        | 1.79                         | 0.26   | 12.23 | 0.553    |
| COVID-19 infection status                                                     |                              |             |              |              |                              |             |              |              |                              |             |              |              |                              |        |       |          |
| PCR-negative                                                                  | Ref                          |             |              |              | Ref                          |             |              |              | Ref                          |             |              |              | Ref                          |        |       |          |
| PCR-positive                                                                  | 1.72                         | 0.50        | 6.00         | 0.392        | 0.91                         | 0.17        | 4.86         | 0.912        | <b>3.57</b>                  | <b>1.07</b> | <b>11.95</b> | <b>0.039</b> | 1.48                         | 0.24   | 9.00  | 0.669    |
| Unknown PCR status                                                            | 0.54                         | 0.04        | 6.79         | 0.632        | 0.49                         | 0.02        | 10.05        | 0.644        | N/A                          |             |              |              | N/A                          |        |       |          |
| <i>R</i> <sup>2</sup>                                                         |                              |             |              |              |                              |             |              |              |                              |             |              |              |                              |        |       |          |
|                                                                               |                              |             |              |              |                              |             |              |              |                              |             |              |              |                              |        |       |          |

Note. HCW, healthcare worker; PCR, Polymerase Chain Reaction; PHQ-9, Patient Health Questionnaire-9. Analysis could not be done for aged  $\geq 60$  due to small number of cases.

**Table S11.** Multiple logistic regression analysis for the item nine scores of PHQ-9 ( $\geq 1$  compared with  $< 1$ ) by job type

|                                                                               | Nurse ( <i>n</i> =214) |             |             |              | Nursing home staff ( <i>n</i> =71) |             |              |              | Other HCW ( <i>n</i> = 241) |           |           |          |
|-------------------------------------------------------------------------------|------------------------|-------------|-------------|--------------|------------------------------------|-------------|--------------|--------------|-----------------------------|-----------|-----------|----------|
|                                                                               | <i>OR</i>              | 95% CI      |             | <i>p</i>     | <i>OR</i>                          | 95% CI      |              | <i>p</i>     | <i>OR</i>                   | 95% CI    |           | <i>p</i> |
|                                                                               |                        | <i>LL</i>   | <i>UL</i>   |              |                                    | <i>LL</i>   | <i>UL</i>    |              |                             | <i>LL</i> | <i>UL</i> |          |
| Facility type                                                                 |                        |             |             |              |                                    |             |              |              |                             |           |           |          |
| Hospital                                                                      | Ref                    |             |             |              | Ref                                |             |              |              | Ref                         |           |           |          |
| Nursing home                                                                  | 3.34                   | 0.91        | 12.24       | 0.069        | <b>0.17</b>                        | <b>0.04</b> | <b>0.76</b>  | <b>0.021</b> | 2.16                        | 0.68      | 6.90      | 0.192    |
| Number of days between outbreak occurrence and response to the screening test | <b>0.97</b>            | <b>0.95</b> | <b>1.00</b> | <b>0.028</b> | 0.92                               | 0.83        | 1.01         | 0.093        | 1.00                        | 0.97      | 1.03      | 0.968    |
| Sex                                                                           |                        |             |             |              |                                    |             |              |              |                             |           |           |          |
| Woman                                                                         | Ref                    |             |             |              | Ref                                |             |              |              | Ref                         |           |           |          |
| Man                                                                           | 0.80                   | 0.23        | 2.82        | 0.731        | 5.26                               | 0.71        | 38.95        | 0.104        | 1.08                        | 0.43      | 2.73      | 0.865    |
| Age (years)                                                                   |                        |             |             |              |                                    |             |              |              |                             |           |           |          |
| 20–29                                                                         | Ref                    |             |             |              | Ref                                |             |              |              | Ref                         |           |           |          |
| 30–39                                                                         | <b>0.19</b>            | <b>0.04</b> | <b>0.81</b> | <b>0.026</b> | 1.72                               | 0.23        | 12.80        | 0.594        | 0.51                        | 0.12      | 2.10      | 0.350    |
| 40–49                                                                         | 0.40                   | 0.13        | 1.19        | 0.099        | <b>6.10</b>                        | <b>1.10</b> | <b>33.80</b> | <b>0.038</b> | 0.74                        | 0.14      | 3.90      | 0.722    |
| 50–59                                                                         | <b>0.09</b>            | <b>0.02</b> | <b>0.47</b> | <b>0.004</b> | 0.80                               | 0.14        | 4.66         | 0.804        | 0.56                        | 0.10      | 3.04      | 0.498    |
| $\geq 60$                                                                     | 0.35                   | 0.07        | 1.86        | 0.219        | N/A                                |             |              |              | 0.95                        | 0.07      | 13.44     | 0.970    |
| COVID-19 infection status                                                     |                        |             |             |              |                                    |             |              |              |                             |           |           |          |
| PCR-negative                                                                  | Ref                    |             |             |              | Ref                                |             |              |              | Ref                         |           |           |          |
| PCR-positive                                                                  | 1.90                   | 0.70        | 5.17        | 0.207        | 3.84                               | 0.88        | 16.66        | 0.073        | 1.45                        | 0.39      | 5.38      | 0.579    |
| Unknown PCR status                                                            | 0.42                   | 0.04        | 4.28        | 0.462        | N/A                                |             |              |              | 0.51                        | 0.05      | 5.23      | 0.567    |
| $R^2$                                                                         | 0.19                   |             |             |              | 0.35                               |             |              |              | 0.05                        |           |           |          |

*Note.* HCW, healthcare worker; PCR, Polymerase Chain Reaction; PHQ-9, Patient Health Questionnaire-9.

**Table S12.** Multiple logistic regression analysis for the item nine scores of PHQ-9 ( $\geq 1$  compared with  $< 1$ ) by COVID-19 infection status

|                                                                               | PCR-negative ( $n = 377$ ) |             |             |              | PCR-positive ( $n = 102$ ) |             |              |              | Unknown PCR status ( $n = 47$ ) |        |       |          |
|-------------------------------------------------------------------------------|----------------------------|-------------|-------------|--------------|----------------------------|-------------|--------------|--------------|---------------------------------|--------|-------|----------|
|                                                                               | OR                         | 95% CI      |             | <i>p</i>     | OR                         | 95% CI      |              | <i>p</i>     | OR                              | 95% CI |       | <i>p</i> |
|                                                                               |                            | LL          | UL          |              |                            | LL          | UL           |              |                                 | LL     | UL    |          |
| Facility type                                                                 |                            |             |             |              |                            |             |              |              |                                 |        |       |          |
| Hospital                                                                      | Ref                        |             |             |              | Ref                        |             |              |              | Ref                             |        |       |          |
| Nursing home                                                                  | 1.51                       | 0.45        | 5.10        | 0.505        | 1.09                       | 0.11        | 11.05        | 0.940        | 0.79                            | 0.10   | 6.13  | 0.820    |
| Number of days between outbreak occurrence and response to the screening test | 0.99                       | 0.96        | 1.01        | 0.203        | 0.97                       | 0.93        | 1.02         | 0.218        | 0.99                            | 0.93   | 1.05  | 0.770    |
| Sex                                                                           |                            |             |             |              |                            |             |              |              |                                 |        |       |          |
| Woman                                                                         | Ref                        |             |             |              | Ref                        |             |              |              | Ref                             |        |       |          |
| Man                                                                           | 0.84                       | 0.32        | 2.20        | 0.719        | <b>6.95</b>                | <b>1.50</b> | <b>32.18</b> | <b>0.013</b> | 1.34                            | 0.33   | 5.51  | 0.683    |
| Age (years)                                                                   |                            |             |             |              |                            |             |              |              |                                 |        |       |          |
| 20–29                                                                         | Ref                        |             |             |              | Ref                        |             |              |              | Ref                             |        |       |          |
| 30–39                                                                         | 0.42                       | 0.16        | 1.10        | 0.078        | 0.18                       | 0.02        | 1.43         | 0.106        | 3.51                            | 0.16   | 77.58 | 0.426    |
| 40–49                                                                         | 0.60                       | 0.23        | 1.56        | 0.298        | 1.42                       | 0.30        | 6.68         | 0.656        | N/A                             |        |       |          |
| 50–59                                                                         | <b>0.30</b>                | <b>0.09</b> | <b>0.98</b> | <b>0.046</b> | 0.23                       | 0.03        | 1.65         | 0.145        | N/A                             |        |       |          |
| $\geq 60$                                                                     | 0.45                       | 0.07        | 2.95        | 0.405        | 0.46                       | 0.02        | 8.66         | 0.602        | N/A                             |        |       |          |
| Job type                                                                      |                            |             |             |              |                            |             |              |              |                                 |        |       |          |
| Other HCW                                                                     | Ref                        |             |             |              | Ref                        |             |              |              | Ref                             |        |       |          |
| Nurse                                                                         | <b>2.43</b>                | <b>1.10</b> | <b>5.38</b> | <b>0.028</b> | 5.36                       | 0.98        | 29.28        | 0.052        | 3.31                            | 0.40   | 27.54 | 0.269    |
| Nursing home staff                                                            | 3.71                       | 0.84        | 16.44       | 0.084        | 4.49                       | 0.57        | 35.01        | 0.152        | N/A                             |        |       |          |
| $R^2$                                                                         | 0.15                       |             |             |              | 0.29                       |             |              |              | 0.17                            |        |       |          |

*Note.* HCW, healthcare worker; PCR, Polymerase Chain Reaction; PHQ-9, Patient Health Questionnaire-9.
